# Supplementary material for: Structural features of monohydrated 2-(4-fluorophenyl)ethylamine: a combined spectroscopic and computational study
Source: Royal Society of Chemistry journal article supplement (doi:10.1039/c7cp04195k), 2017-01-01
Supplement: c7cp04195k1.pdf [file c7cp04195k1.pdf]

**Supplementary Information for**

**Structural features of monohydrated 2-(4-fluoro-phenyl)-ethylamine: A  
combined spectroscopic and computational study**

*Afik Shachar, Nitzan Mayorkas and Ilana Bar*

**Table S1.** Vibrational transition frequencies (cm<sup>-1</sup>) and intensities (arb. units) as obtained from the measured ionization-loss stimulated Raman and calculated scaled harmonic Raman spectra.

|                 | Measured |      | Calculated |      |                 | Measured |      | Calculated |      |
|-----------------|----------|------|------------|------|-----------------|----------|------|------------|------|
|                 | Freq.    | Int. | Freq.      | Int. |                 | Freq.    | Int. | Freq.      | Int. |
| v <sub>1</sub>  | 3719.8   | 0.6  | 3717.1     | 0.6  | v <sub>27</sub> | 1212.8   | 0.5  | 1208.1     | 0.3  |
| v <sub>2</sub>  | 3401.6   | 0.4  | 3413.2     | 0.4  | v <sub>28</sub> |          |      | 1195.6     | 0.1  |
| v <sub>3</sub>  | 3355.6   | 0.4  | 3354.7     | 0.6  | v <sub>29</sub> | 1165.4   | 0.3  | 1152.6     | 0.1  |
| v <sub>4</sub>  | 3328.6   | 0.6  | 3331.2     | 0.8  | v <sub>30</sub> | 1141.3   | 0.2  | 1139.2     | 0.1  |
| v <sub>5</sub>  |          |      | 3080.1     | 0.9  | v <sub>31</sub> | 1109.2   | 0.2  | 1097.2     | 0.0  |
| v <sub>6</sub>  | 3083.4   | 0.9  | 3078.8     | 0.9  | v <sub>32</sub> | 1080.0   | 0.2  | 1081.3     | 0.2  |
| v <sub>7</sub>  | 3028.4   | 0.2  | 3043.7     | 0.4  | v <sub>33</sub> | 1030.3   | 0.3  | 1036.3     | 0.1  |
| v <sub>8</sub>  | 3017.4   | 0.2  | 3041.1     | 0.4  | v <sub>34</sub> |          |      | 1010.1     | 0.0  |
| v <sub>9</sub>  | 2972.5   | 0.5  | 2984.1     | 0.3  | v <sub>35</sub> |          |      | 993.9      | 0.0  |
| v <sub>10</sub> | 2963.9   | 0.6  | 2946.0     | 1.2  | v <sub>36</sub> |          |      | 951.2      | 0.0  |
| v <sub>11</sub> | 2939.2   | 0.5  | 2918.7     | 0.8  | v <sub>37</sub> | 901.9    | 0.1  | 919.9      | 0.1  |
| v <sub>12</sub> | 2868.0   | 0.4  | 2867.3     | 0.7  | v <sub>38</sub> | 893.9    | 0.4  | 908.0      | 0.2  |
| v <sub>13</sub> | 1639.7   | 0.1  | 1640.6     | 0.3  | v <sub>39</sub> | 869.8    | 0.2  | 872.4      | 0.1  |
| v <sub>14</sub> | 1618.8   | 0.1  | 1626.0     | 0.2  | v <sub>40</sub> | 840.6    | 0.3  | 841.0      | 0.4  |
| v <sub>15</sub> | 1606.8   | 0.1  | 1606.2     | 0.1  | v <sub>41</sub> | 822.3    | 0.4  | 832.1      | 1.1  |
| v <sub>16</sub> | 1584.8   | 0.2  | 1595.5     | 0.1  | v <sub>42</sub> | 816.5    | 0.2  | 826.4      | 0.0  |
| v <sub>17</sub> | 1556.6   | 0.1  | 1522.5     | 0.0  | v <sub>43</sub> |          |      | 735.3      | 0.0  |
| v <sub>18</sub> | 1474.2   | 0.2  | 1475.1     | 0.2  | v <sub>44</sub> |          |      | 715.2      | 0.1  |
| v <sub>19</sub> | 1453.0   | 0.2  | 1456.7     | 0.2  | v <sub>45</sub> |          |      | 703.9      | 0.1  |
| v <sub>20</sub> | 1436.9   | 0.1  | 1424.9     | 0.0  | v <sub>46</sub> | 612.1    | 0.2  | 632.2      | 0.4  |
| v <sub>21</sub> |          |      | 1382.3     | 0.0  | v <sub>47</sub> | 561.0    | 0.3  | 555.8      | 0.0  |
| v <sub>22</sub> | 1348.6   | 0.3  | 1343.4     | 0.3  | v <sub>48</sub> | 490.1    | 0.3  | 499.3      | 0.1  |
| v <sub>23</sub> |          |      | 1309.1     | 0.2  | v <sub>49</sub> | 468.0    | 0.3  | 472.4      | 0.1  |
| v <sub>24</sub> |          |      | 1298.5     | 0.0  | v <sub>50</sub> | 414.9    | 0.1  | 430.0      | 0.1  |
| v <sub>25</sub> |          |      | 1288.7     | 0.0  | v <sub>51</sub> |          |      | 416.9      | 0.0  |
| v <sub>26</sub> | 1234.7   | 0.3  | 1249.9     | 0.6  | v <sub>52</sub> |          |      | 414.9      | 0.2  |
